# Supplementary material for: Moderate Mechanical Stimulation Protects Rats against Osteoarthritis through the Regulation of TRAIL via the NF-κB/NLRP3 Pathway
Source: Hindawi journal article supplement (doi:10.1155/2020/6196398), 2020-05-25
Supplement: f1 [file 6196398.f1.pdf]

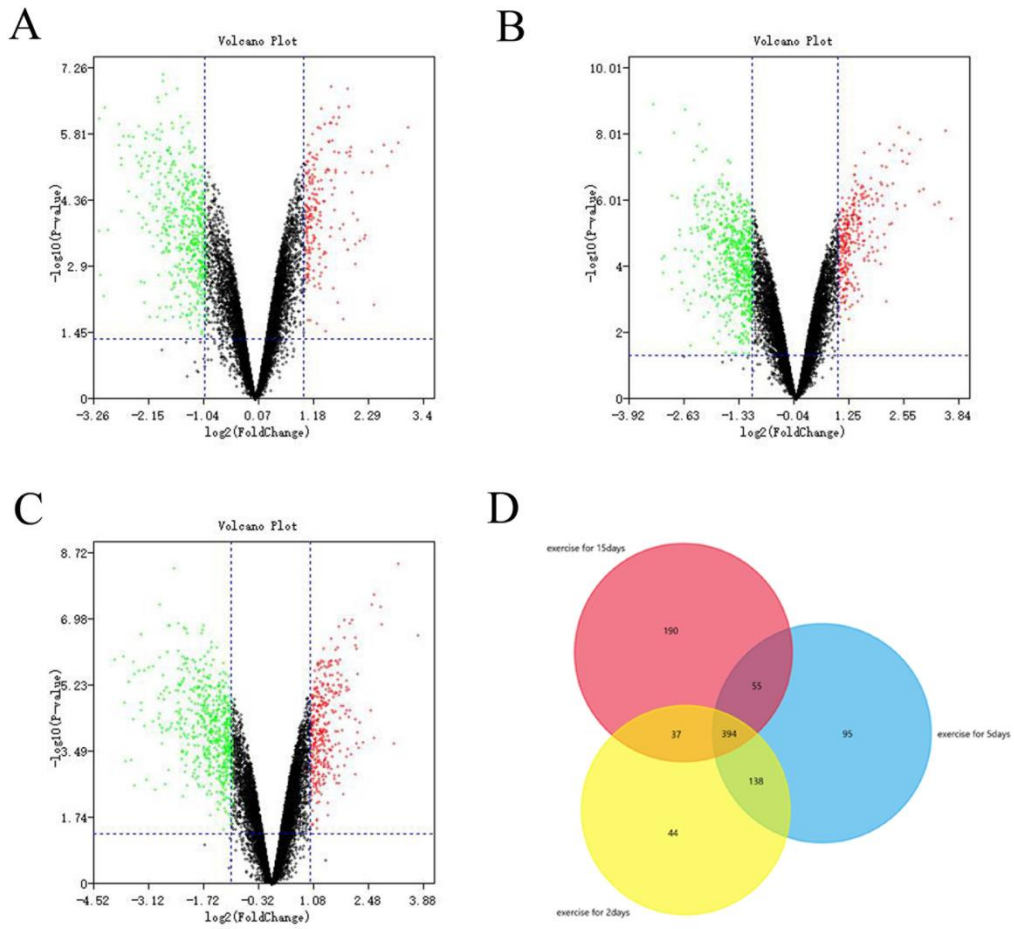

**Fig S1. Volcano plots and Venn diagram of the DE-miRNAs.** (A-C) The black dots represent miRNAs that are not differentially expressed between cartilage from unexercised or exercised rats for 2 (A), 5 (B), or 15 (C) days. The red and green dots represent the upregulated and downregulated miRNAs, respectively. (D) The Venn diagram of these DE-miRNAs..

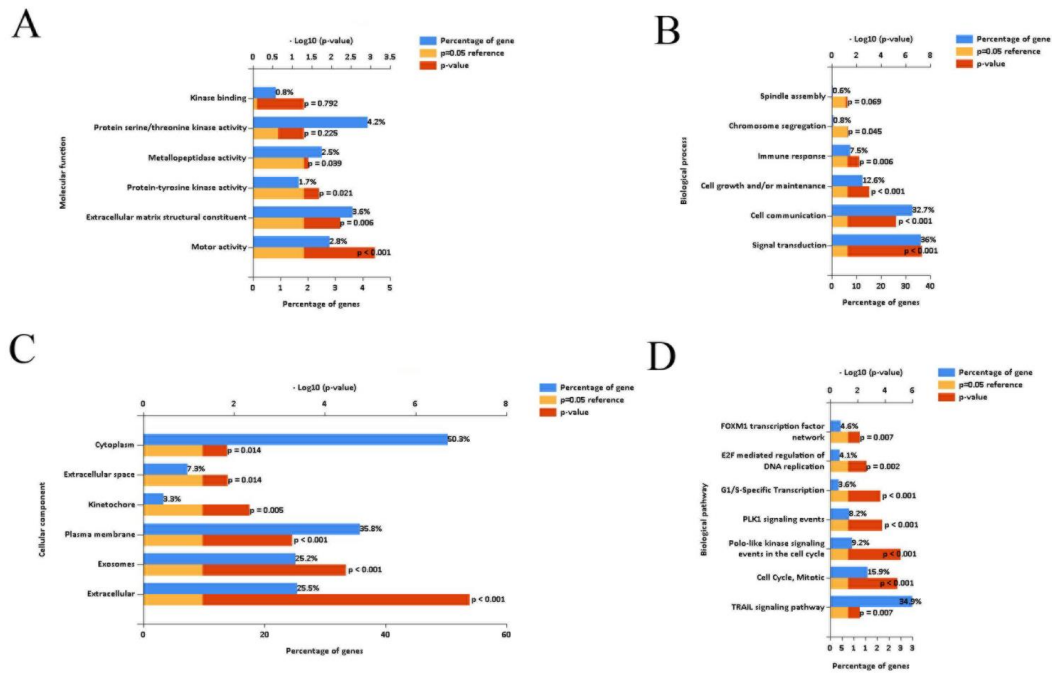

**Fig S2. GO functional annotation analysis.** Four categories of GO functional annotation analysis were performed on the potential target genes, including molecular function (A), biological process (B), cellular component (C), and biological pathway (D).

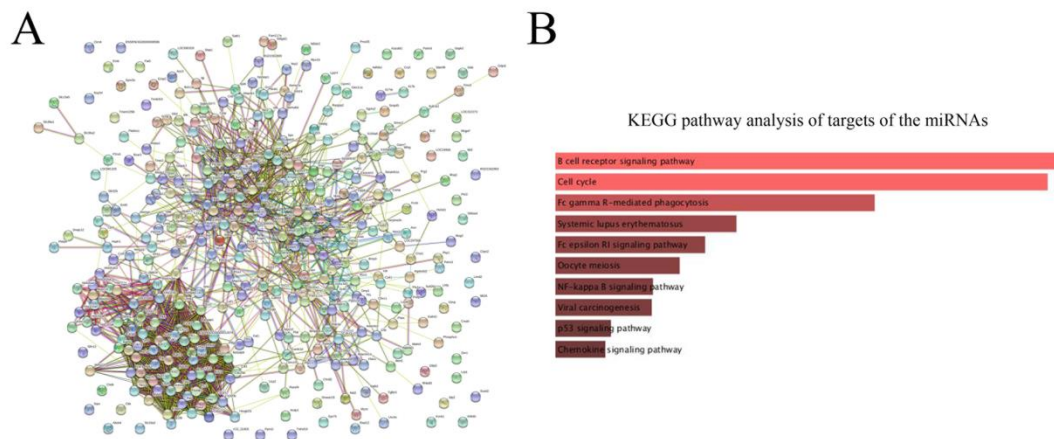

**Fig S3. Protein-protein interaction (PPI) network and KEGG pathway enrichment analysis of target genes.**
